# Supplementary material for: CiXTH29 and CiLEA4 Role in Water Stress Tolerance in Cichorium intybus Varieties
Source: MDPI journal article supplement (doi:10.3390/biology12030444), 2023-03-13
Supplement: s1 [file s1]

**Table S1.** Primer used for cloning and RT-qPCR analysis.

| Primer Name                | Sequence                     | Analysis |
|----------------------------|------------------------------|----------|
| <i>CiAct2</i> for          | 5'-CCAAATCCAGCTCATCAGTCG-3'  | RT-qPCR  |
| <i>CiAct2</i> rev          | 5'-TCTTTCGGCTCCGATGGRGAT-3'  | RT-qPCR  |
| <i>CiTub2</i> for          | 5'-GCACGGCATTGATGTGACC-3'    | RT-qPCR  |
| <i>CiTub2</i> rev          | 5'-GAACAACCTCCCGCCACT-3'     | RT-qPCR  |
| <i>AtXTH29-3'</i> clonefor | 5'-TGGTATCGTCGTCGCTTTCT-3'   | Cloning  |
| <i>AtXTH29-3'</i> clonerev | 5'- GTCCAGTATCTCTAAACCGG-3'  | Cloning  |
| <i>CiXTH29RT</i> for       | 5'-TGATAAAGTTGCCAGGAGCG-3'   | RT-qPCR  |
| <i>CiXTH29RT</i> rev       | 5'-AGGCTTTCCTTCTAGGTTCC-3'   | RT-qPCR  |
| <i>CsLEA4</i> for          | 5'-CGGCTTGGGTATGCTAATGT-3'   | RT-qPCR  |
| <i>CsLEA4</i> rev          | 5'- CGTCAAGGCAAGAAAAATTG -3' | RT-qPCR  |

| Descriptions                                                                                                | Graphic Summary   | Alignments | Taxonomy    |             |         |           |          |                |
|-------------------------------------------------------------------------------------------------------------|-------------------|------------|-------------|-------------|---------|-----------|----------|----------------|
| Sequences producing significant alignments                                                                  |                   |            |             |             |         |           |          |                |
| Download Select columns Show 100                                                                            |                   |            |             |             |         |           |          |                |
| select all 11 sequences selected                                                                            |                   |            |             |             |         |           |          |                |
| GeneBank Graphics Distance tree of results MSA Viewer                                                       |                   |            |             |             |         |           |          |                |
| Description                                                                                                 | Scientific Name   | Max Score  | Total Score | Query Cover | E value | Per Ident | Pos. Len | Accession      |
| Arabidopsis thaliana xyloglucan endotransglucosylase/hydrolase 29 (XTH29) mRNA                              | Arabidopsis thal. | 1258       | 1258        | 100%        | 0.0     | 89.71%    | 1383     | NM_118617.3    |
| Arabidopsis thaliana clone G103022 putative xyloglucan endo-transglucosylase (AtXTH29) mRNA contig          | Arabidopsis thal. | 1258       | 1258        | 100%        | 0.0     | 89.71%    | 1105     | AY133103.1     |
| Arabidopsis thaliana xyloglucan endotransglucosylase/hydrolase 29 (XTH29) mRNA                              | Arabidopsis thal. | 1218       | 1218        | 98%         | 0.0     | 89.70%    | 1382     | NM_001345113.3 |
| PREDICTED Arabidopsis thaliana subunit beta (putative) xyloglucan endotransglucosylase/hydrolase (putative) | Arabidopsis thal. | 1075       | 1075        | 100%        | 0.0     | 84.91%    | 1457     | XM_002080792.2 |
| PREDICTED Arabidopsis thaliana subunit beta (putative) xyloglucan endotransglucosylase/hydrolase (putative) | Arabidopsis thal. | 1042       | 1042        | 96%         | 0.0     | 84.85%    | 1093     | XM_001010874.1 |
| PREDICTED Carosella rubella (putative) xyloglucan endotransglucosylase/hydrolase protein 29 (LOC170)        | Carosella rubella | 928        | 928         | 100%        | 0.0     | 80.68%    | 1242     | XM_006289214.2 |
| PREDICTED Carosella sativa (putative) xyloglucan endotransglucosylase/hydrolase protein 29 (LOC304)         | Carosella sativa  | 926        | 926         | 100%        | 0.0     | 81.03%    | 1200     | XM_015406371.2 |
| PREDICTED Carosella sativa (putative) xyloglucan endotransglucosylase/hydrolase protein 29 (LOC304)         | Carosella sativa  | 915        | 915         | 100%        | 0.0     | 80.74%    | 1234     | XM_015405129.1 |
| PREDICTED Carosella sativa (putative) xyloglucan endotransglucosylase/hydrolase protein 29 (LOC304)         | Carosella sativa  | 911        | 911         | 99%         | 0.0     | 80.71%    | 1263     | XM_015404548.1 |
| PREDICTED Carosella rubella (putative) xyloglucan endotransglucosylase/hydrolase protein 29 (LOC170)        | Carosella rubella | 894        | 894         | 96%         | 0.0     | 80.75%    | 961      | XM_023739312.1 |
| PREDICTED Carosella sativa (putative) xyloglucan endotransglucosylase/hydrolase protein 29 (LOC304)         | Carosella sativa  | 881        | 881         | 96%         | 0.0     | 80.60%    | 960      | XM_018232729.1 |
| Arabidopsis thaliana genome assembly chromosome 4                                                           | Arabidopsis thal. | 833        | 1221        | 96%         | 0.0     | 89.99%    | 18725877 | LR02545.3      |
| Arabidopsis thaliana genome assembly chromosome 4                                                           | Arabidopsis thal. | 833        | 1209        | 96%         | 0.0     | 89.59%    | 18104425 | LR009773.1     |
| Arabidopsis thaliana genome assembly chromosome 4                                                           | Arabidopsis thal. | 833        | 1209        | 96%         | 0.0     | 89.58%    | 18579300 | LR009708.1     |
| Arabidopsis thaliana genome assembly chromosome 4                                                           | Arabidopsis thal. | 833        | 1209        | 96%         | 0.0     | 89.56%    | 18619438 | LR215055.1     |
| Arabidopsis thaliana genome assembly chromosome 4                                                           | Arabidopsis thal. | 833        | 1221        | 96%         | 0.0     | 89.50%    | 22582341 | CG258885.3     |
| Arabidopsis thaliana sylex001 0021 chromosome 4 sequence                                                    | Arabidopsis thal. | 833        | 1209        | 96%         | 0.0     | 89.59%    | 70003804 | CP5880747.1    |
| Arabidopsis thaliana sylex001 0412 chromosome 4 sequence                                                    | Arabidopsis thal. | 833        | 1209        | 96%         | 0.0     | 89.56%    | 20418078 | CP5880737.1    |
| Arabidopsis thaliana sylex001 0470 chromosome 4 sequence                                                    | Arabidopsis thal. | 833        | 1209        | 96%         | 0.0     | 89.56%    | 30379551 | CP5880731.1    |

A)

Descriptions

Graphic Summary

Alignments

Taxonomy

Sequences producing significant alignments

Download Select columns Show 100

select all

100 sequences selected

GenPept

Graphics

Distance tree of results

Multiple alignment

MSA Viewer

|                                     | Description                                                                                                 | Scientific Name    | Max Score | Total Score | Query Cover | E value | Per Ident | Pos. Len | Accession      |
|-------------------------------------|-------------------------------------------------------------------------------------------------------------|--------------------|-----------|-------------|-------------|---------|-----------|----------|----------------|
| <input checked="" type="checkbox"/> | unnamed protein product (Arabidopsis thaliana)                                                              | Arabidopsis thal.  | 479       | 479         | 100%        | 3e-170  | 88.13%    | 279      | CAI5335397.1   |
| <input checked="" type="checkbox"/> | unnamed protein product (Arabidopsis thaliana)                                                              | Arabidopsis thal.  | 481       | 481         | 100%        | 1e-169  | 89.13%    | 343      | CAA0365775.1   |
| <input checked="" type="checkbox"/> | xyloglucan endotransglucosylase/hydrolase 29 (Arabidopsis thaliana)                                         | Arabidopsis thal.  | 480       | 480         | 100%        | 3e-168  | 88.13%    | 357      | NP_183838.1    |
| <input checked="" type="checkbox"/> | Ghosech xyloglucanase family 16 (Arabidopsis suessii)                                                       | Arabidopsis sue.   | 480       | 480         | 100%        | 4e-168  | 88.13%    | 357      | KAG7625217.1   |
| <input checked="" type="checkbox"/> | xyloglucan endotransglucosylase C-terminal (Arabidopsis suessii)                                            | Arabidopsis sue.   | 471       | 471         | 100%        | 2e-165  | 88.52%    | 357      | KAG7540886.1   |
| <input checked="" type="checkbox"/> | xyloglucan endotransglucosylase/hydrolase 29 (Arabidopsis thaliana)                                         | Arabidopsis thal.  | 468       | 468         | 99%         | 3e-160  | 94.92%    | 283      | NP_001229723.1 |
| <input checked="" type="checkbox"/> | Ghosech xyloglucanase family 16 (Arabidopsis suessii)                                                       | Arabidopsis sue.   | 467       | 467         | 99%         | 4e-165  | 94.92%    | 283      | KAG7625218.1   |
| <input checked="" type="checkbox"/> | Ghosech xyloglucanase family 16 (Arabidopsis suessii)                                                       | Arabidopsis sue.   | 465       | 465         | 98%         | 9e-160  | 89.10%    | 255      | KAG7625219.1   |
| <input checked="" type="checkbox"/> | xyloglucan endotransglucosylase C-terminal (Arabidopsis suessii)                                            | Arabidopsis sue.   | 456       | 456         | 96%         | 4e-161  | 88.41%    | 255      | KAG7540887.1   |
| <input checked="" type="checkbox"/> | PREDICTED <i>Carosella rubella</i> xyloglucan endotransglucosylase/hydrolase protein 29 (Carosella rubella) | Carosella rubella  | 445       | 445         | 100%        | 4e-155  | 82.21%    | 381      | XP_010488431.1 |
| <input checked="" type="checkbox"/> | xyloglucan endotransglucosylase C-terminal (Arabidopsis thaliana x Arabidopsis suessii)                     | Arabidopsis thal.  | 481       | 481         | 100%        | 1e-154  | 88.70%    | 1800     | KAG7616246.1   |
| <input checked="" type="checkbox"/> | PREDICTED <i>Carosella rubella</i> xyloglucan endotransglucosylase/hydrolase protein 29 (Carosella rubella) | Carosella rubella  | 443       | 443         | 100%        | 3e-154  | 91.34%    | 381      | XP_010488473.1 |
| <input checked="" type="checkbox"/> | PREDICTED <i>Carosella rubella</i> xyloglucan endotransglucosylase/hydrolase protein 29 (Carosella rubella) | Carosella rubella  | 441       | 441         | 98%         | 1e-153  | 91.74%    | 360      | XP_010488762.1 |
| <input checked="" type="checkbox"/> | unnamed protein product (Arabidopsis thaliana)                                                              | Arabidopsis thal.  | 439       | 439         | 100%        | 5e-153  | 86.66%    | 338      | CAI8276102.1   |
| <input checked="" type="checkbox"/> | <i>Carosella rubella</i> xyloglucan endotransglucosylase/hydrolase protein 29 (Carosella rubella)           | Carosella rubella  | 438       | 438         | 100%        | 2e-152  | 91.81%    | 381      | XP_005285078.1 |
| <input checked="" type="checkbox"/> | <i>Carosella rubella</i> xyloglucan endotransglucosylase/hydrolase protein 29 (Carosella rubella)           | Carosella rubella  | 438       | 438         | 100%        | 2e-152  | 90.65%    | 357      | XP_005285078.1 |
| <input checked="" type="checkbox"/> | unnamed protein product (Microthloexia reticulata)                                                          | Microthloexia ret. | 438       | 438         | 100%        | 2e-152  | 88.51%    | 364      | CAA2528827.1   |
| <input checked="" type="checkbox"/> | xyloglucan endotransglucosylase/hydrolase protein 29 (Carosella rubella)                                    | Carosella rubella  | 432       | 432         | 100%        | 3e-151  | 88.70%    | 284      | KAG7544458.1   |

B)

**Figure S1.** Comparison of *CiXTH29* nucleotide (A) and amino acid (B) sequence with all the other sequences present in BLAST database.

| Descriptions                                                                                                       |                                  |           |             |             |         |             |          |                             |  |
|--------------------------------------------------------------------------------------------------------------------|----------------------------------|-----------|-------------|-------------|---------|-------------|----------|-----------------------------|--|
| Sequences producing significant alignments                                                                         |                                  |           |             |             |         |             |          |                             |  |
| Download Select columns Show 100                                                                                   |                                  |           |             |             |         |             |          |                             |  |
| Select all 0 sequences selected                                                                                    |                                  |           |             |             |         |             |          |                             |  |
| GenBank Genomes Database RefSeq NCBI                                                                               |                                  |           |             |             |         |             |          |                             |  |
| Description                                                                                                        | Scientific Name                  | Max Score | Total Score | Query Cover | E value | Per. Ident. | Acc. Len | Accession                   |  |
| <input type="checkbox"/> Arabidopsis thaliana genome assembly, chromosome 1                                        | <a href="#">Arabidopsis thal</a> | 113       | 113         | 92%         | 3e-21   | 95.46%      | 35272351 | <a href="#">L10102542.1</a> |  |
| <input type="checkbox"/> Arabidopsis thaliana genome assembly, chromosome 1                                        | <a href="#">Arabidopsis thal</a> | 113       | 113         | 92%         | 3e-21   | 95.46%      | 35401407 | <a href="#">L10099745.2</a> |  |
| <input type="checkbox"/> Arabidopsis thaliana genome assembly, chromosome 1                                        | <a href="#">Arabidopsis thal</a> | 113       | 113         | 92%         | 3e-21   | 95.46%      | 35044433 | <a href="#">L10099779.1</a> |  |
| <input type="checkbox"/> Arabidopsis thaliana genome assembly, chromosome 1                                        | <a href="#">Arabidopsis thal</a> | 113       | 113         | 92%         | 3e-21   | 95.46%      | 29179729 | <a href="#">L10099783.1</a> |  |
| <input type="checkbox"/> Arabidopsis thaliana genome assembly, chromosome 1                                        | <a href="#">Arabidopsis thal</a> | 113       | 113         | 92%         | 3e-21   | 95.46%      | 29653075 | <a href="#">L10099758.1</a> |  |
| <input type="checkbox"/> Arabidopsis thaliana genome assembly, chromosome 1                                        | <a href="#">Arabidopsis thal</a> | 113       | 113         | 92%         | 3e-21   | 95.46%      | 35243396 | <a href="#">L10099750.1</a> |  |
| <input type="checkbox"/> Arabidopsis thaliana genome assembly, chromosome 1                                        | <a href="#">Arabidopsis thal</a> | 113       | 113         | 92%         | 3e-21   | 95.46%      | 35045930 | <a href="#">L10210352.1</a> |  |
| <input type="checkbox"/> Arabidopsis thaliana Late embryogenesis abundant protein, group 1 protein (AtLEA-1), mRNA | <a href="#">Arabidopsis thal</a> | 113       | 113         | 92%         | 3e-21   | 95.46%      | 858      | <a href="#">NM_102991.4</a> |  |
| <input type="checkbox"/> Arabidopsis thaliana genome assembly, chromosome 1                                        | <a href="#">Arabidopsis thal</a> | 113       | 113         | 92%         | 3e-21   | 95.46%      | 33709400 | <a href="#">X0291810.1</a>  |  |
| <input type="checkbox"/> Arabidopsis thaliana genome assembly, chromosome 1                                        | <a href="#">Arabidopsis thal</a> | 113       | 113         | 92%         | 3e-21   | 95.46%      | 33225756 | <a href="#">X0291805.1</a>  |  |
| <input type="checkbox"/> Arabidopsis thaliana genome assembly, chromosome 1                                        | <a href="#">Arabidopsis thal</a> | 113       | 113         | 92%         | 3e-21   | 95.46%      | 33394868 | <a href="#">X0291800.1</a>  |  |
| <input type="checkbox"/> Arabidopsis thaliana genome assembly, chromosome 1                                        | <a href="#">Arabidopsis thal</a> | 113       | 113         | 92%         | 3e-21   | 95.46%      | 32900767 | <a href="#">X0291791.1</a>  |  |
| <input type="checkbox"/> Arabidopsis thaliana genome assembly, chromosome 1                                        | <a href="#">Arabidopsis thal</a> | 113       | 113         | 92%         | 3e-21   | 95.46%      | 33352777 | <a href="#">X0291784.1</a>  |  |
| <input type="checkbox"/> Arabidopsis thaliana genome assembly, chromosome 1                                        | <a href="#">Arabidopsis thal</a> | 113       | 113         | 92%         | 3e-21   | 95.46%      | 33064871 | <a href="#">X0291788.1</a>  |  |
| <input type="checkbox"/> Arabidopsis thaliana genome assembly, chromosome 1                                        | <a href="#">Arabidopsis thal</a> | 113       | 113         | 92%         | 3e-21   | 95.46%      | 33630734 | <a href="#">X0291790.1</a>  |  |
| <input type="checkbox"/> Arabidopsis thaliana genome assembly, chromosome 1                                        | <a href="#">Arabidopsis thal</a> | 113       | 113         | 92%         | 3e-21   | 95.46%      | 34277122 | <a href="#">X0291785.1</a>  |  |
| <input type="checkbox"/> Arabidopsis thaliana genome assembly, chromosome 1                                        | <a href="#">Arabidopsis thal</a> | 113       | 113         | 92%         | 3e-21   | 95.46%      | 33155062 | <a href="#">X0291730.1</a>  |  |
| <input type="checkbox"/> Arabidopsis thaliana genome assembly, chromosome 1                                        | <a href="#">Arabidopsis thal</a> | 113       | 113         | 92%         | 3e-21   | 95.46%      | 33341246 | <a href="#">X0291741.1</a>  |  |

A)

| Download GenBank Graphics                                                                  |        |                                                              |          |           |  |  |     |  |  |
|--------------------------------------------------------------------------------------------|--------|--------------------------------------------------------------|----------|-----------|--|--|-----|--|--|
| Arabidopsis thaliana Late embryogenesis abundant protein, group 1 protein (AtLEA4-1), mRNA |        |                                                              |          |           |  |  |     |  |  |
| Sequence ID: <a href="#">NM_102991.4</a> Length: 859 Number of Matches: 1                  |        |                                                              |          |           |  |  |     |  |  |
| Range 1: 159 to 223 GenBank Graphics                                                       |        |                                                              |          |           |  |  |     |  |  |
| Score                                                                                      | Expect | Identities                                                   | Gaps     | Strand    |  |  |     |  |  |
| 113 bits(125)                                                                              | 3e-21  | 64/65(98%)                                                   | 0/65(0%) | Plus/Plus |  |  |     |  |  |
| Query                                                                                      | 6      | GAGGAGGAAGAGATAGCGCACCAACGGAGGAAGGCGAAGGAAGCGAGAGCGAATATGGAT |          |           |  |  | 65  |  |  |
| Sbjct                                                                                      | 159    | GAGGAGGAAGAGATAGCGCACCAACGGAGGAAGGCGAAGGAAGCGAGAGCGAATATGGAT |          |           |  |  | 218 |  |  |
| Query                                                                                      | 66     | ATTCA                                                        |          |           |  |  | 70  |  |  |
| Sbjct                                                                                      | 219    | ATGCA                                                        |          |           |  |  | 223 |  |  |

B)

**Figure S2.** Comparison of *CiLEA4* nucleotide sequence with all the other sequences present in BLAST database (A). Alignment of *CiLEA4* PCR product (query) with *AtLEA4* (Sbjct) (B).

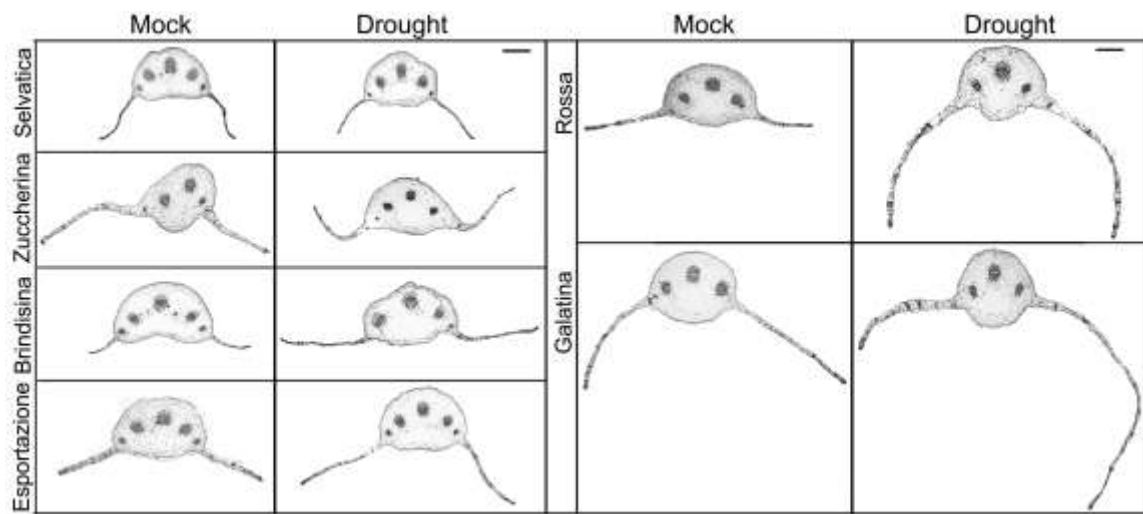

**Figure S3.** Bright field images of leaf lamina thin transverse section of 6-week-old chicory varieties in mock and drought stress conditions.

Scale bar = 1 mm.

**Table S2.** Validation of reference genes in *C. intybus*. Ct values of the candidate reference genes *CiAct2* and *CiTub2* in 6-week-old chicory plants kept for further 10 days with (Mock) or without watering (Drought). Ct values of the three biological replicates for the six studied varieties. Means  $\pm$  SD of single independent experiments and Coefficient of Variation (CV) are reported.

|            | Sample          | CiAct2   |                      |           |                          |            | CV         | Total Mean | SD       | CV       | CiTub-2    |                    |            |                          |             | CV          | Total Mean | SD         | CV         |
|------------|-----------------|----------|----------------------|-----------|--------------------------|------------|------------|------------|----------|----------|------------|--------------------|------------|--------------------------|-------------|-------------|------------|------------|------------|
|            |                 | Ct value | Experiment<br>1 mean | SD        | Experiment<br>Total Mean | SD         |            |            |          |          | Ct Value   | Experiment<br>mean | SD         | Experiment<br>Total Mean | SD          |             |            |            |            |
| Solonica   | Shoot CTRL1     | 24.63    | 25.0869667           | 0.2709958 | 24.7053333               | 0.48735248 | 0.81889648 | 24.5725599 | 0.091901 | 0.026522 | 26.96      | 26.4233333         | 0.51731248 | 26.52                    | 0.36285378  | 0.01443755  | 26.1570279 | 1.38475158 | 0.05299994 |
|            | Shoot CTRL2     | 25.96    |                      |           |                          |            |            |            |          |          | 27.82      |                    |            |                          |             |             |            |            |            |
|            | Shoot CTRL3     | 23.37    |                      |           |                          |            |            |            |          |          | 26.09      |                    |            |                          |             |             |            |            |            |
|            | Drought stress1 | 24.46    | 24.33                | 0.2689865 |                          |            |            |            |          |          | 26.6168667 | 0.36521572         |            |                          |             |             |            |            |            |
|            | Drought stress2 | 24.09    |                      |           |                          |            |            |            |          |          | 26.35      |                    |            |                          |             |             |            |            |            |
| Zucchena   | Drought stress3 | 24.49    |                      |           |                          |            |            |            |          |          | 26.83      |                    |            |                          |             |             |            |            |            |
|            | Shoot CTRL1     | 24.70    | 25.0533333           | 0.2366071 | 24.975                   | 0.48928337 | 0.81633858 |            |          |          | 25.807     | 26.089             | 0.40289858 | 27.1245                  | 1.218661744 | 0.04585112  |            |            |            |
|            | Shoot CTRL2     | 25.76    |                      |           |                          |            |            |            |          |          | 26.64      |                    |            |                          |             |             |            |            |            |
|            | Shoot CTRL3     | 25.22    |                      |           |                          |            |            |            |          |          | 25.76      |                    |            |                          |             |             |            |            |            |
|            | Drought stress1 | 24.53    | 24.8869667           | 0.583685  |                          |            |            |            |          |          | 26.317     | 26.16              | 0.40260224 |                          |             |             |            |            |            |
| Dondara    | Drought stress2 | 24.59    |                      |           |                          |            |            |            |          |          | 26.569     |                    |            |                          |             |             |            |            |            |
|            | Drought stress3 | 25.57    |                      |           |                          |            |            |            |          |          | 27.63      |                    |            |                          |             |             |            |            |            |
|            | Shoot CTRL1     | 24.1     | 24.48                | 0.4687217 | 24.8869667               | 0.62944762 | 0.62525238 |            |          |          | 26.74      | 26.8689667         | 0.142118   | 27.086                   | 0.01834367  | 0.002882517 |            |            |            |
|            | Shoot CTRL2     | 24.36    |                      |           |                          |            |            |            |          |          | 26.94      |                    |            |                          |             |             |            |            |            |
|            | Shoot CTRL3     | 23.81    |                      |           |                          |            |            |            |          |          | 27.01      |                    |            |                          |             |             |            |            |            |
| Ergasilime | Drought stress1 | 25.86    | 25.2833333           | 0.3437217 |                          |            |            |            |          |          | 27.93      | 27.2753333         | 0.81019576 |                          |             |             |            |            |            |
|            | Drought stress2 | 24.76    |                      |           |                          |            |            |            |          |          | 26.238     |                    |            |                          |             |             |            |            |            |
|            | Drought stress3 | 23.21    |                      |           |                          |            |            |            |          |          | 27.06      |                    |            |                          |             |             |            |            |            |
|            | Shoot CTRL1     | 24.94    | 25.9869667           | 0.283784  | 24.8733333               | 0.77942714 | 0.85158968 |            |          |          | 25.718     | 24.881             | 0.73856278 | 26.035                   | 1.43026195  | 0.05435622  |            |            |            |
|            | Shoot CTRL2     | 23.68    |                      |           |                          |            |            |            |          |          | 24.36      |                    |            |                          |             |             |            |            |            |
| Rome       | Shoot CTRL3     | 24.24    |                      |           |                          |            |            |            |          |          | 24.5       |                    |            |                          |             |             |            |            |            |
|            | Drought stress1 | 25.59    | 25.36                | 0.153648  |                          |            |            |            |          |          | 26.473     | 27.261             | 0.83617057 |                          |             |             |            |            |            |
|            | Drought stress2 | 28.4     |                      |           |                          |            |            |            |          |          | 27.86      |                    |            |                          |             |             |            |            |            |
|            | Drought stress3 | 25.49    |                      |           |                          |            |            |            |          |          | 27.49      |                    |            |                          |             |             |            |            |            |
|            | Shoot CTRL1     | 24.04    | 23.5133333           | 0.4742714 | 23.585                   | 0.75968336 | 0.0369048  |            |          |          | 23.778     | 23.8609667         | 0.10677984 | 24.4263333               | 0.5852612   | 0.00396614  |            |            |            |
| Gaenna     | Shoot CTRL2     | 23.12    |                      |           |                          |            |            |            |          |          | 24.869     |                    |            |                          |             |             |            |            |            |
|            | Shoot CTRL3     | 23.30    |                      |           |                          |            |            |            |          |          | 24.1       |                    |            |                          |             |             |            |            |            |
|            | Drought stress1 | 24.23    | 24.4766667           | 0.812318  |                          |            |            |            |          |          | 25.21      | 24.85              | 0.51733088 |                          |             |             |            |            |            |
|            | Drought stress2 | 25.81    |                      |           |                          |            |            |            |          |          | 24.89      |                    |            |                          |             |             |            |            |            |
|            | Drought stress3 | 25.17    |                      |           |                          |            |            |            |          |          | 24.25      |                    |            |                          |             |             |            |            |            |
|            | Shoot CTRL1     | 24.54    | 23.89                | 0.35      | 24.185                   | 0.3724255  | 0.81543281 |            |          |          | 24.37      | 24.2233333         | 0.18565146 | 25.7583333               | 1.68881131  | 0.06580036  |            |            |            |
|            | Shoot CTRL2     | 23.89    |                      |           |                          |            |            |            |          |          | 24.17      |                    |            |                          |             |             |            |            |            |
|            | Shoot CTRL3     | 23.64    |                      |           |                          |            |            |            |          |          | 24.43      |                    |            |                          |             |             |            |            |            |
|            | Drought stress1 | 24.45    | 24.46                | 0.1571623 |                          |            |            |            |          |          | 27.21      | 27.2833333         | 0.18876794 |                          |             |             |            |            |            |
|            | Drought stress2 | 24.34    |                      |           |                          |            |            |            |          |          | 27.13      |                    |            |                          |             |             |            |            |            |
|            | Drought stress3 | 24.95    |                      |           |                          |            |            |            |          |          | 27.5       |                    |            |                          |             |             |            |            |            |

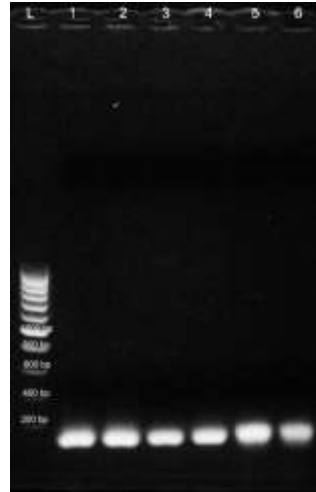

**Figure S4.** 2.0% agarose gel showing *CiXTH29* amplicon sizes for the different variety. Lane L: 200bp DNA ladder, *CiXTH29* PCR amplimer (~ 100 bp) obtained from Selvatica (lane 1), Zuccherina di Trieste (lane 2), Brindisina (lane 3), Esportazione (lane 4), Rossa Italiana (lane 5) and Galatina (lane 6) variety cDNA.

| Descriptions                                                                                            |                                   |           |             |             |         |             |                     |
|---------------------------------------------------------------------------------------------------------|-----------------------------------|-----------|-------------|-------------|---------|-------------|---------------------|
| Sequences producing significant alignments                                                              |                                   |           |             |             |         |             |                     |
| Download Select columns Show 100                                                                        |                                   |           |             |             |         |             |                     |
| select all 32 sequences selected                                                                        |                                   |           |             |             |         |             |                     |
| GenBank Graphics Distance tree of results MSA Viewer                                                    |                                   |           |             |             |         |             |                     |
| Description                                                                                             | Scientific Name                   | Max Score | Total Score | Query Cover | E Value | Per. Ident. | Acc. Num.           |
| <input checked="" type="checkbox"/> Arabidopsis thaliana cytochrome oxidase subunit 2 (COX2), mRNA      | <a href="#">Arabidopsis thal.</a> | 182       | 182         | 100%        | 4e-44   | 100.00%     | 1363 NM_118517.3    |
| <input checked="" type="checkbox"/> Arabidopsis thaliana cytochrome oxidase subunit 2 (COX2), mRNA      | <a href="#">Arabidopsis thal.</a> | 182       | 182         | 100%        | 4e-44   | 100.00%     | 1105 AY130703.5     |
| <input checked="" type="checkbox"/> Arabidopsis thaliana genome assembly, chromosome 4                  | <a href="#">Arabidopsis thal.</a> | 110       | 183         | 100%        | 2e-22   | 100.00%     | 18725877 LUT02543.1 |
| <input checked="" type="checkbox"/> Arabidopsis thaliana cytochrome oxidase subunit 2 (COX2), mRNA      | <a href="#">Arabidopsis thal.</a> | 110       | 110         | 80%         | 2e-22   | 100.00%     | 1202 M130131311.1   |
| <input checked="" type="checkbox"/> Arabidopsis thaliana genome assembly, chromosome 4                  | <a href="#">Arabidopsis thal.</a> | 110       | 183         | 100%        | 2e-22   | 100.00%     | 21038885 CP110263.1 |
| <input checked="" type="checkbox"/> Arabidopsis thaliana genome assembly, chromosome 4                  | <a href="#">Arabidopsis thal.</a> | 110       | 183         | 100%        | 2e-22   | 100.00%     | 27502341 GAC00005.1 |
| <input checked="" type="checkbox"/> Arabidopsis thaliana genome assembly, chromosome 4                  | <a href="#">Arabidopsis thal.</a> | 110       | 183         | 100%        | 2e-22   | 100.00%     | 22104501 CP081128.2 |
| <input checked="" type="checkbox"/> Arabidopsis thaliana cytochrome oxidase subunit 2 (COX2), mRNA      | <a href="#">Arabidopsis thal.</a> | 110       | 183         | 100%        | 2e-22   | 100.00%     | 21570073 CP080027.1 |
| <input checked="" type="checkbox"/> Arabidopsis thaliana genome assembly, chromosome 4                  | <a href="#">Arabidopsis thal.</a> | 110       | 183         | 100%        | 2e-22   | 100.00%     | 18580056 CP002097.1 |
| <input checked="" type="checkbox"/> Arabidopsis thaliana DNA, chromosome 4, contig fragment No. 48      | <a href="#">Arabidopsis thal.</a> | 110       | 183         | 100%        | 2e-22   | 100.00%     | 188075 AL351548.2   |
| <input checked="" type="checkbox"/> Arabidopsis thaliana DNA, chromosome 4, BAC clone F13C5 (BAC clone) | <a href="#">Arabidopsis thal.</a> | 110       | 183         | 100%        | 2e-22   | 100.00%     | 111911 AL021711.2   |
| <input checked="" type="checkbox"/> Arabidopsis thaliana genome assembly, chromosome 4                  | <a href="#">Arabidopsis thal.</a> | 104       | 172         | 100%        | 9e-21   | 98.31%      | 18785480 LRR0748.2  |
| <input checked="" type="checkbox"/> Arabidopsis thaliana genome assembly, chromosome 4                  | <a href="#">Arabidopsis thal.</a> | 104       | 172         | 100%        | 9e-21   | 98.31%      | 19104405 LRR00773.1 |
| <input checked="" type="checkbox"/> Arabidopsis thaliana genome assembly, chromosome 4                  | <a href="#">Arabidopsis thal.</a> | 104       | 172         | 100%        | 9e-21   | 98.31%      | 18578309 LRR08788.1 |
| <input checked="" type="checkbox"/> Arabidopsis thaliana genome assembly, chromosome 4                  | <a href="#">Arabidopsis thal.</a> | 104       | 172         | 100%        | 9e-21   | 98.31%      | 18371560 LRR09783.1 |
| <input checked="" type="checkbox"/> Arabidopsis thaliana genome assembly, chromosome 4                  | <a href="#">Arabidopsis thal.</a> | 104       | 172         | 100%        | 9e-21   | 98.31%      | 18786787 LRR09738.1 |
| <input checked="" type="checkbox"/> Arabidopsis thaliana genome assembly, chromosome 4                  | <a href="#">Arabidopsis thal.</a> | 104       | 172         | 100%        | 9e-21   | 98.31%      | 18802281 LRR09753.1 |
| <input checked="" type="checkbox"/> Arabidopsis thaliana genome assembly, chromosome 4                  | <a href="#">Arabidopsis thal.</a> | 104       | 172         | 100%        | 9e-21   | 98.31%      | 18019438 LRR15055.1 |

**Figure S5.** Comparison of *CiXTH29* amplimer nucleotide sequence with *AtXTH29* nucleotide sequence.

|  |              | mRNA amount             |                         |
|--|--------------|-------------------------|-------------------------|
|  |              | <i>CiXTH29</i>          |                         |
|  |              | Mock                    | Drought                 |
|  |              | $2^{-\Delta Cq} \pm SD$ | $2^{-\Delta Cq} \pm SD$ |
|  | Selvatica    | 0,00340 $\pm$ 0,00040   | 0,0023 $\pm$ 0,00020    |
|  | Zuccherina   | 0,00270 $\pm$ 0,000040  | 0,0038 $\pm$ 0,00070    |
|  | Brindisina   | 0,00051 $\pm$ 0,00009   | 0,00426 $\pm$ 0,00037   |
|  | Esportazione | 0,00098 $\pm$ 0,00060   | 0,00532 $\pm$ 0,00033   |
|  | Rossa        | 0,00111 $\pm$ 0,00021   | 0,005322 $\pm$ 0,00067  |
|  | Galatina     | 0,00147 $\pm$ 0,00038   | 0,00716 $\pm$ 0,00067   |

**Figure S6.** Amplification output values of *CiXTH29* mRNAs in mock condition and after drought stress. The values are expressed as  $2^{-\Delta Cq} \pm SD$  and are considered as proportional to the amount of mRNA target according to [56].

|  |              | mRNA amount             |                         |
|--|--------------|-------------------------|-------------------------|
|  |              | <i>CiLEA4</i>           |                         |
|  |              | Mock                    | Drought                 |
|  |              | $2^{-\Delta Cq} \pm SD$ | $2^{-\Delta Cq} \pm SD$ |
|  | Selvatica    | 0,00390 ± 0,00113       | 0,00450 ± 0,00063       |
|  | Zuccherina   | 0,00171 ± 0,00038       | 0,00137 ± 0,00029       |
|  | Brindisina   | 0,00083 ± 0,00030       | 0,00475 ± 0,00123       |
|  | Esportazione | 0,00075 ± 0,00012       | 0,00337 ± 0,00027       |
|  | Rossa        | 0,00047 ± 0,00005       | 0,00199 ± 0,00014       |
|  | Galatina     | 0,00096 ± 0,00015       | 0,00228 ± 0,00017       |

**Figure S7.** Amplification output values of *CiLEA4* mRNAs in mock condition and after drought stress. The values are expressed as  $2^{-\Delta Cq} \pm SD$  and are considered as proportional to the amount of mRNA target according to [56].
